# Supplementary material for: Characterization of a Centrifugal Microfluidic Orthogonal Flow Platform
Source: MDPI journal article supplement (doi:10.3390/mi13030487), 2022-03-20
Supplement: s1 [file s1]

Article

# Characterization of a Centrifugal Microfluidic Orthogonal Flow Platform

Michael Shane Woolf <sup>1,\*</sup>, Leah M. Dignan <sup>1</sup>, Scott M. Karas <sup>1</sup>, Hannah M. Lewis <sup>1</sup>, Kevyn C. Hadley <sup>1</sup>, Aeren Q. Nauman <sup>1,2</sup>, Marcellene A. Gates-Hollingsworth <sup>3</sup>, David P. AuCoin <sup>3</sup>, Geoffrey M. Geise <sup>4</sup> and James P. Landers <sup>1,5,6</sup>

<sup>1</sup> Department of Chemistry, University of Virginia, Charlottesville, VA 22904, USA; lmd4bt@virginia.edu (L.M.D.); sk3ff@virginia.edu (S.M.K.); hml9wn@virginia.edu (H.M.L.); Kch6pr@virginia.edu (K.C.H.); jpl5e@virginia.edu (J.P.L.)

<sup>2</sup> TeGrex Technologies, Charlottesville, VA 22903, USA; aqn6cd@virginia.edu (A.Q.N.)

<sup>3</sup> Department of Microbiology and Immunology, University of Nevada, Reno, NV 89557, USA; mhollingsworth@med.unr.edu (M.A.G.-H.); daucoin@med.unr.edu (D.P.A.)

<sup>4</sup> Department of Chemical Engineering, University of Virginia, Charlottesville, VA 22904, USA; geise@virginia.edu

<sup>5</sup> Department of Mechanical Engineering, University of Virginia, Charlottesville, VA 22904, USA

<sup>6</sup> Department of Pathology, University of Virginia, Charlottesville, VA 22904, USA

\* Correspondence: msw2s@virginia.edu

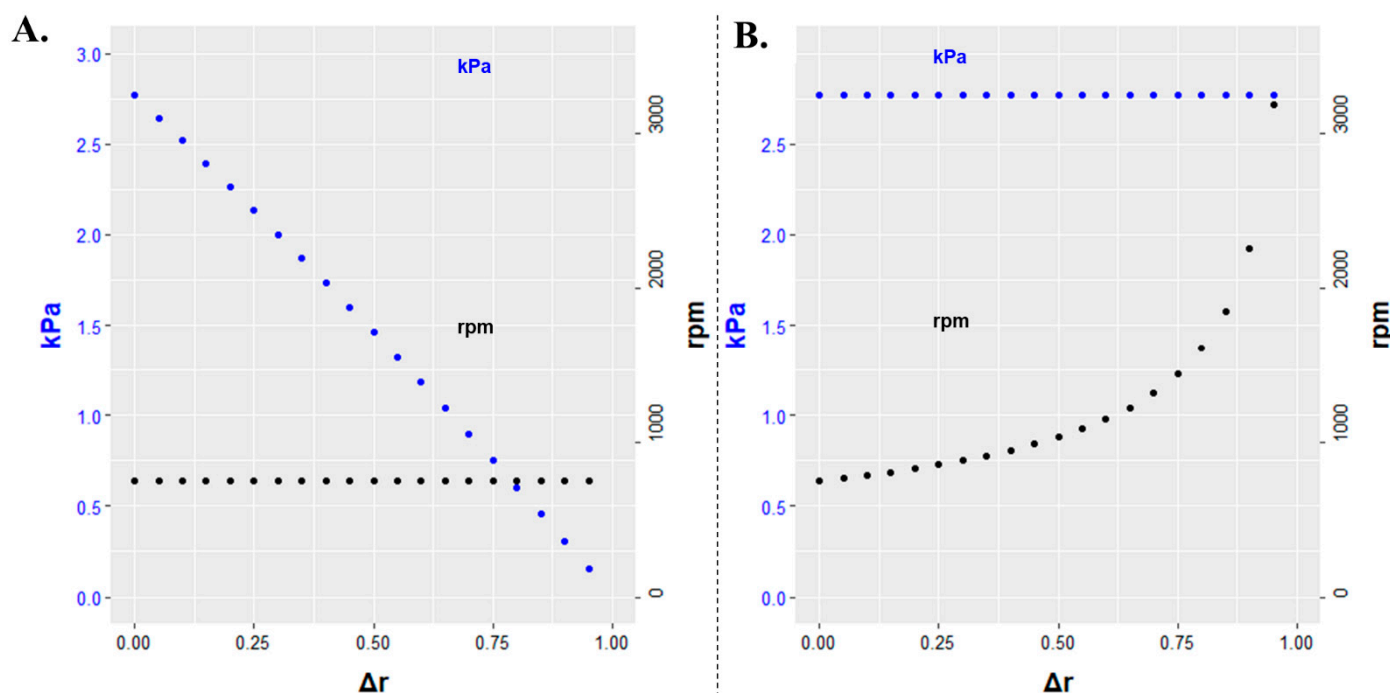

**Figure S1.** Predicted changes in hydraulic pressure head (kPa) as a function of changing fluid column height ( $\Delta r$ ).
